# Supplementary material for: Polynuclear cyanoruthenate chromophores based on hexaaza-triphenylene containing up to twelve cyanides: photophysical and structural properties
Source: Royal Society of Chemistry journal article supplement (doi:10.1039/b601876a), 2006-01-01
Supplement: b601876a.pdf [file b601876a.pdf]

## Polynuclear cyanoruthenate chromophores based on hexaaza-triphenylene containing up to twelve cyanides: photophysical and structural properties

Juan-Manuel Herrera, Michael D. Ward, Harry Adams, Simon J. A. Pope and Stephen Faulkner

### Supporting information

Table S1: Analytical, <sup>1</sup>H-NMR and IR spectroscopic data for the Ru<sub>x</sub>-HAT complexes

| Complex                                                                                                                                | Elem analysis (%C, %H, %N) <sup>a</sup>    | <sup>1</sup> H-NMR (D <sub>2</sub> O) δ(ppm)                                               | Principal IR spectral peaks (cm <sup>-1</sup> ) <sup>c</sup>                |
|----------------------------------------------------------------------------------------------------------------------------------------|--------------------------------------------|--------------------------------------------------------------------------------------------|-----------------------------------------------------------------------------|
| Na <sub>2</sub> [Ru(C <sub>12</sub> N <sub>6</sub> H <sub>6</sub> )(CN) <sub>4</sub> ].4H <sub>2</sub> O                               | 33.9 (34.4)<br>2.3 (2.5)<br>25.0 (25.1)    | 9.18 (2H, s)<br>9.25 (2H, d, J 2.75 Hz)<br>9.74 (2H, d, J 2.75 Hz)                         | 3431, 2105, 2073,<br>2062, 1629, 1384                                       |
| PPN <sub>2</sub> [Ru(C <sub>12</sub> N <sub>6</sub> H <sub>6</sub> )(CN) <sub>4</sub> ].5H <sub>2</sub> O <sup>b</sup>                 | 65.6 (65.8)<br>4.5 (4.7)<br>10.3 (10.5)    | 7.55 (60H, multiplet)<br>9.02 (2H, d, J 2.85Hz)<br>9.21 (2H, s)<br>10.00 (2H, d, J 2.9Hz)  | 3435, 2099, 2071,<br>1639, 1438, 1289,<br>1265, 1115, 724, 693,<br>548, 534 |
| Na <sub>4</sub> [Ru <sub>2</sub> (C <sub>12</sub> N <sub>6</sub> H <sub>6</sub> )(CN) <sub>8</sub> ].8H <sub>2</sub> O                 | 26.2 (27.2)<br>2.4 (2.51)<br>21.9 (22.2)   | 9.33 (2H, d, J 2.75Hz)<br>9.64 (2H, s)<br>9.77 (2H, d, J 2.75Hz)                           | 3436, 2099, 2068,<br>2057, 1632, 1387                                       |
| PPN <sub>4</sub> [Ru <sub>2</sub> (C <sub>12</sub> N <sub>6</sub> H <sub>6</sub> )(CN) <sub>8</sub> ].14H <sub>2</sub> O <sup>b</sup>  | 64.6 (64.5)<br>4.8 (5.1)<br>8.22 (8.26)    | 7.55 (120H, multiplet)<br>8.90 (2H, d, J 2.75Hz)<br>9.60 (2H, s)<br>9.93 (2H, d, J 2.75Hz) | 3435, 2097, 2069,<br>1636, 1437, 1262,<br>1115, 724, 694, 549,<br>533       |
| Na <sub>6</sub> [Ru <sub>3</sub> (C <sub>12</sub> N <sub>6</sub> H <sub>6</sub> )(CN) <sub>12</sub> ].12H <sub>2</sub> O               | 23.0 (23.94)<br>2.4 (2.51)<br>20.0 (20.94) | 9.66 (6H,s)                                                                                | 3436, 2102, 2070,<br>1630, 1390                                             |
| PPN <sub>6</sub> [Ru <sub>3</sub> (C <sub>12</sub> N <sub>6</sub> H <sub>6</sub> )(CN) <sub>12</sub> ].10H <sub>2</sub> O <sup>b</sup> | 67.6 (67.6)<br>4.9 (4.8)<br>8.1 (7.9)      | 7.55 (180H,multiplet)<br>9.54 (6H, s)                                                      | 3434, 2093, 2068,<br>1634, 1437, 1263,<br>1114, 723, 692, 548,<br>534       |

<sup>a</sup> calculated figures are in parentheses.

<sup>b</sup> PPN salts are hygroscopic, elemental analysis have been done on samples which had attained a final steady weight in air

<sup>c</sup> PPN bands are in red.

Table S2: UV-vis absorption spectra of Ru<sub>x</sub>-HAT derivatives

| Sodium salts                                                                                                             |                  |                                                             |                    |                                                             |
|--------------------------------------------------------------------------------------------------------------------------|------------------|-------------------------------------------------------------|--------------------|-------------------------------------------------------------|
| Compounds                                                                                                                | H <sub>2</sub> O |                                                             | CH <sub>3</sub> OH |                                                             |
|                                                                                                                          | λ<br>(nm)        | ε x 10 <sup>-3</sup><br>(M <sup>-1</sup> cm <sup>-1</sup> ) | λ<br>(nm)          | ε x 10 <sup>-3</sup><br>(M <sup>-1</sup> cm <sup>-1</sup> ) |
| Na <sub>2</sub> [Ru(C <sub>12</sub> N <sub>6</sub> H <sub>6</sub> )(CN) <sub>4</sub> ].4H <sub>2</sub> O                 | 443              | 8.2                                                         | 482                | 8.8                                                         |
| Na <sub>4</sub> [Ru <sub>2</sub> (C <sub>12</sub> N <sub>6</sub> H <sub>6</sub> )(CN) <sub>8</sub> ].8H <sub>2</sub> O   | 478              | 14.1                                                        | 520                | 15.9                                                        |
|                                                                                                                          | 516 (sh)         | 13.7                                                        | 571 (sh)           | 13.9                                                        |
| Na <sub>6</sub> [Ru <sub>3</sub> (C <sub>12</sub> N <sub>6</sub> H <sub>6</sub> )(CN) <sub>12</sub> ].12H <sub>2</sub> O | 524              | 28.0                                                        | 575                | 28.3                                                        |

| PPN salts                                                                                                                 |                    |                                                             |           |                                                             |           |                                                             |
|---------------------------------------------------------------------------------------------------------------------------|--------------------|-------------------------------------------------------------|-----------|-------------------------------------------------------------|-----------|-------------------------------------------------------------|
| Compounds                                                                                                                 | CH <sub>3</sub> CN |                                                             | DCM       |                                                             | DMF       |                                                             |
|                                                                                                                           | λ<br>(nm)          | ε x 10 <sup>-3</sup><br>(M <sup>-1</sup> cm <sup>-1</sup> ) | λ<br>(nm) | ε x 10 <sup>-3</sup><br>(M <sup>-1</sup> cm <sup>-1</sup> ) | λ<br>(nm) | ε x 10 <sup>-3</sup><br>(M <sup>-1</sup> cm <sup>-1</sup> ) |
| PPN <sub>2</sub> [Ru(C <sub>12</sub> N <sub>6</sub> H <sub>6</sub> )(CN) <sub>4</sub> ].5H <sub>2</sub> O                 | 527                | 11.7                                                        | 523       | 11.4                                                        | 546       | 11.3                                                        |
|                                                                                                                           | 578(sh)            | 8.5                                                         | 579(sh)   | 8.1                                                         | 618(sh)   | 7.1                                                         |
| PPN <sub>4</sub> [Ru <sub>2</sub> (C <sub>12</sub> N <sub>6</sub> H <sub>6</sub> )(CN) <sub>8</sub> ].14H <sub>2</sub> O  | 576                | 21.1                                                        | 572       | 22.2                                                        | 596       | 22.8                                                        |
|                                                                                                                           | 657(sh)            | 14.1                                                        | 644(sh)   | 14.2                                                        | 692       | 12.6                                                        |
|                                                                                                                           | 780sh              | 5.7                                                         | 744(sh)   | 6.1                                                         | 805       | 6.4                                                         |
| PPN <sub>6</sub> [Ru <sub>3</sub> (C <sub>12</sub> N <sub>6</sub> H <sub>6</sub> )(CN) <sub>12</sub> ].10H <sub>2</sub> O | 602sh              | 27.2                                                        | 593sh     | 26.4                                                        | 610sh     | 26.3                                                        |
|                                                                                                                           | 666                | 34.8                                                        | 632       | 32.6                                                        | 692       | 36.4                                                        |
|                                                                                                                           | 739sh              | 21.1                                                        | 705sh     | 21.1                                                        | 762sh     | 20.95                                                       |

*Table S3: Bond lengths in the crystal structure of Nd<sub>2</sub>[{Ru(CN)<sub>4</sub>}<sub>3</sub>(μ<sup>3</sup>-HAT) • 23H<sub>2</sub>O*

|               |           |
|---------------|-----------|
| Nd(1)-O(55')  | 2.425(17) |
| Nd(1)-O(51)   | 2.482(8)  |
| Nd(1)-O(54)   | 2.496(6)  |
| Nd(1)-N(34)#1 | 2.515(8)  |
| Nd(1)-O(55)   | 2.518(14) |
| Nd(1)-N(46)#2 | 2.525(9)  |
| Nd(1)-O(53)   | 2.528(7)  |
| Nd(1)-N(44)   | 2.555(7)  |
| Nd(1)-N(48)#3 | 2.571(9)  |
| Nd(1)-O(52)   | 2.59(3)   |
| Nd(1)-O(52')  | 2.62(2)   |
| Ru(2)-C(33)#4 | 1.970(9)  |
| Ru(2)-C(33)   | 1.970(9)  |
| Ru(2)-C(35)   | 2.022(15) |
| Ru(2)-C(31)   | 2.032(17) |
| Ru(2)-N(15)#4 | 2.104(7)  |
| Ru(2)-N(15)   | 2.104(7)  |
| Ru(3)-C(45)   | 1.975(10) |
| Ru(3)-C(43)   | 1.978(9)  |
| Ru(3)-C(47)   | 1.998(10) |
| Ru(3)-C(41)   | 2.040(10) |
| Ru(3)-N(22)   | 2.111(8)  |
| Ru(3)-N(12)   | 2.115(7)  |

---

Symmetry transformations used to generate equivalent atoms:

#1 x+1,y,z-1 #2 -x+2,-y+1,-z+1 #3 x+1,y,z

#4 x,-y+1/2,z #5 x-1,y,z+1 #6 x-1,y,z #7 -x+2,-y+1,-z+2
